# Supplementary material for: Effect of the graphene oxide reduction method on the photocatalytic and electrocatalytic activities of reduced graphene oxide/TiO2 composite
Source: Royal Society of Chemistry journal article supplement (doi:10.1039/c5ra13065d), 2015-01-01
Supplement: c5ra13065d1.pdf [file c5ra13065d1.pdf]

## Supporting Materials for RSC Advances

### Section A (Reproducibility Study Regarding Using Domestic Microwave)

Figure R1 shows the XRD patterns for three different batches of hydrazine hydrate – reduced graphene oxide (HHRGO). It is clear that using a domestic microwave did not affect the reproducibility of the results.

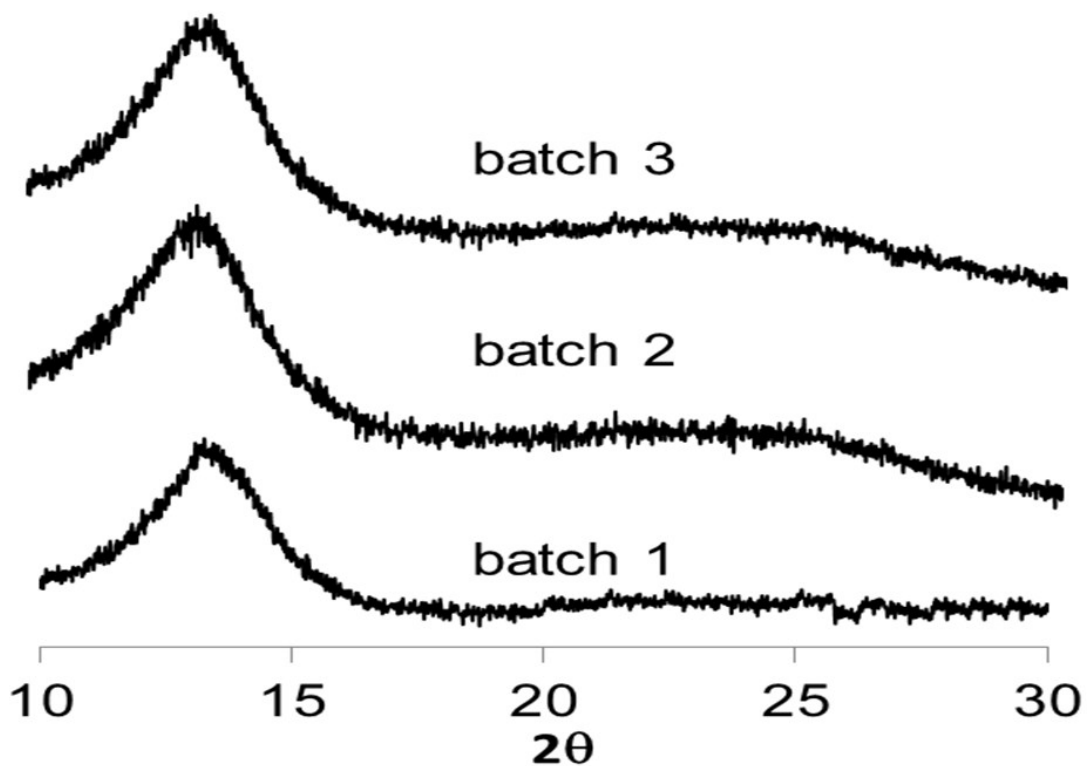

**Figure R1.** XRD patterns for hydrazine hydrate – reduced GO (HHRGO) using a domestic 1000 W domestic microwave.

In Figure R2, the Raman shift for three different batches of HHRGO. These results also confirm the reproducibility of using the domestic microwave.

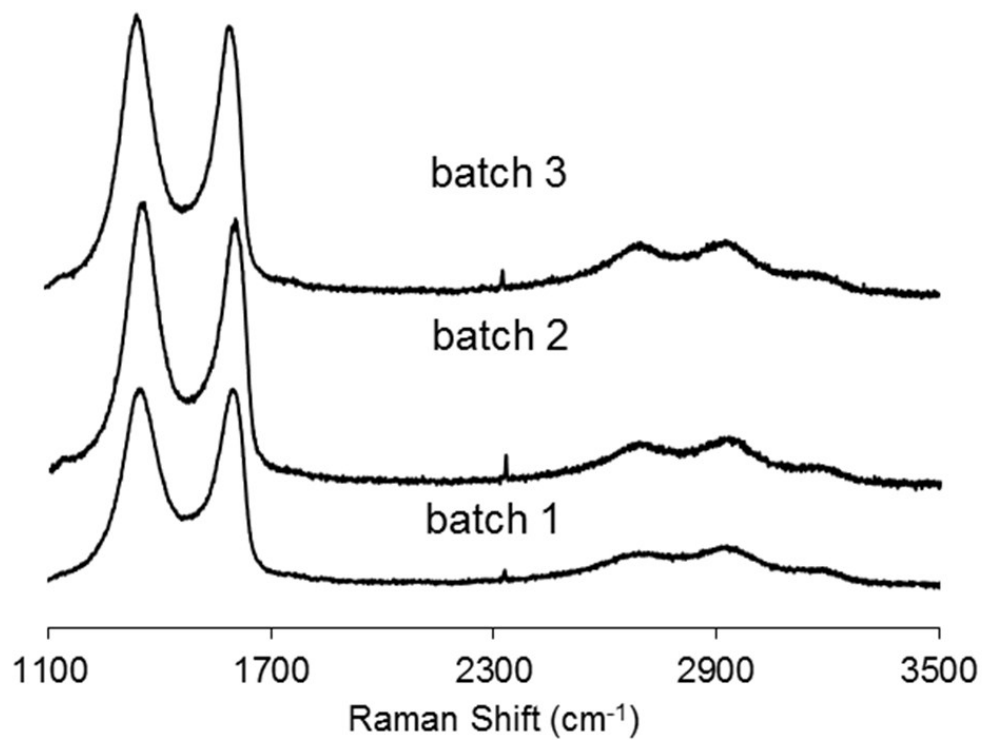

**Figure R2.** Raman spectra at 532 nm for three different batches of hydrazine hydrate – reduced graphene oxide using a 1000 W domestic microwave.

## Section B (Effect of using H<sub>2</sub>O<sub>2</sub> with the photocatalysts)

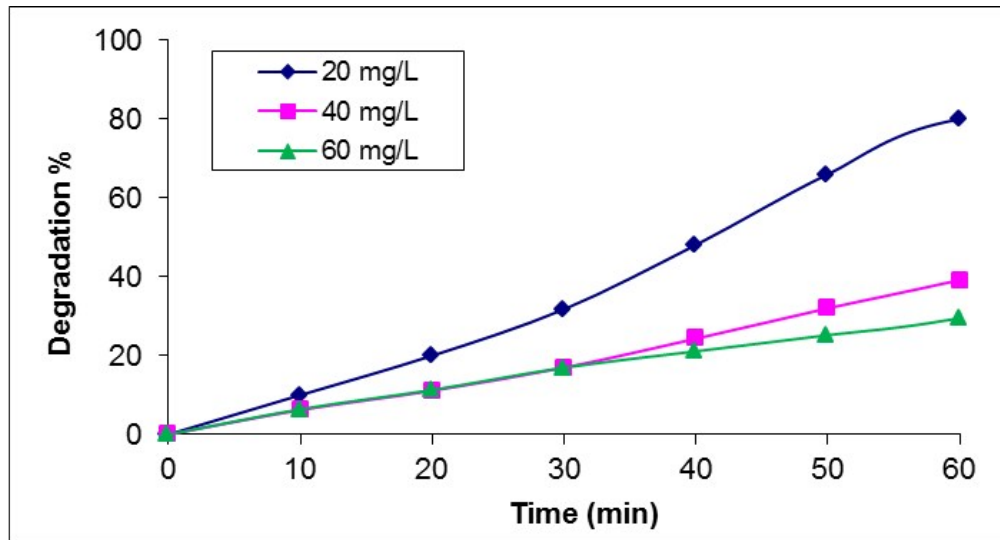

**Figure S1.** Photocatalytic degradation of different phenol concentrations using 0.1 g TiO<sub>2</sub> in the presence of 70  $\mu$ L of H<sub>2</sub>O<sub>2</sub> under 300 W UV illumination.

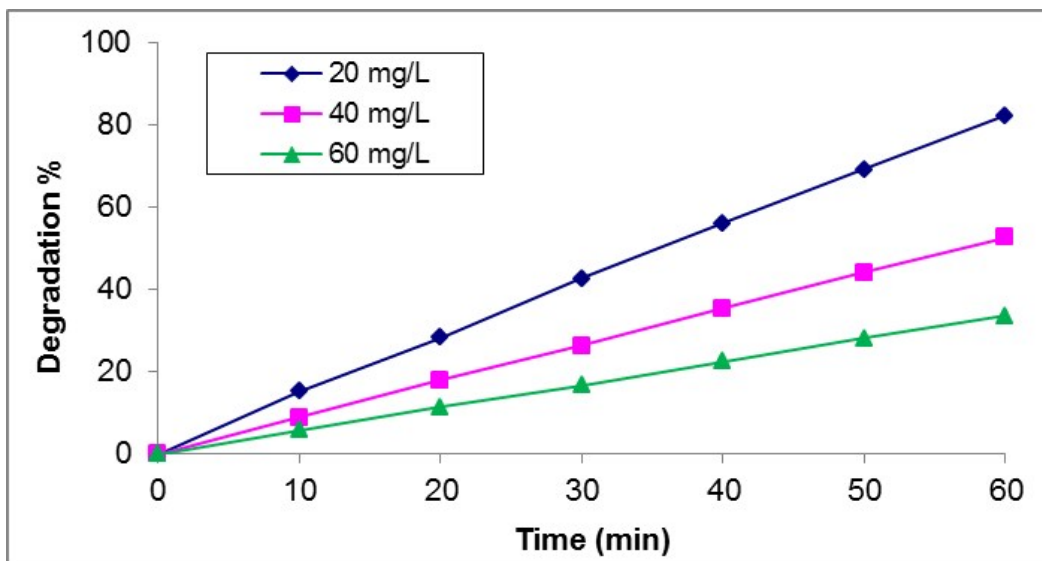

**Figure S2.** Photocatalytic degradation of different phenol concentrations using 0.1 g RGOTi (hydrothermally reduced graphene oxide/TiO<sub>2</sub> composite) in the presence of 70  $\mu$ L of H<sub>2</sub>O<sub>2</sub> under 300 W UV illumination.

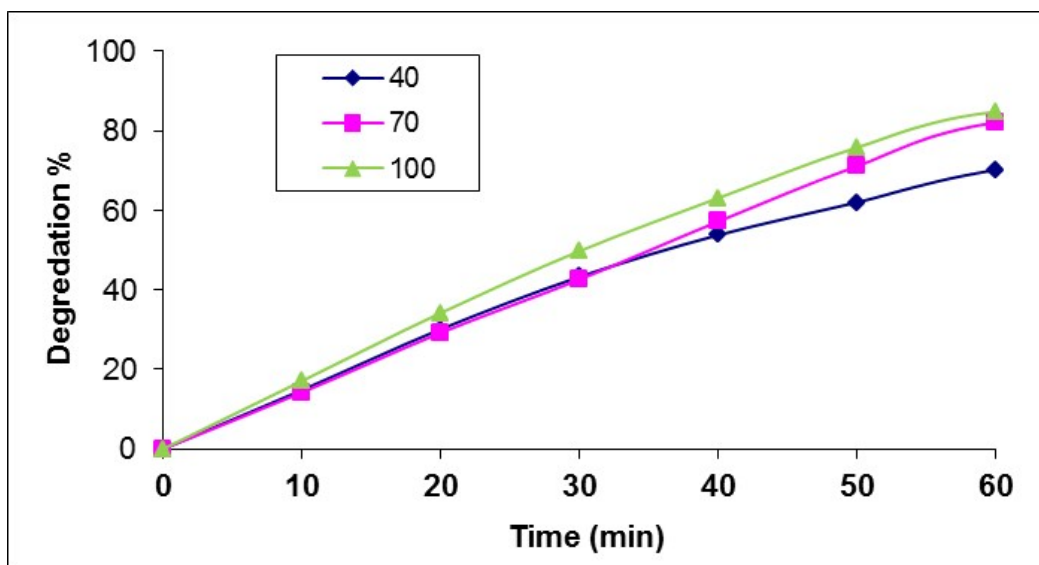

**Figure S3.** Photocatalytic degradation of 20 mg L<sup>-1</sup> phenol with different amounts of H<sub>2</sub>O<sub>2</sub> (40, 70, and 100 μL) under 300 W UV illumination using 0.1 g RGOTi.

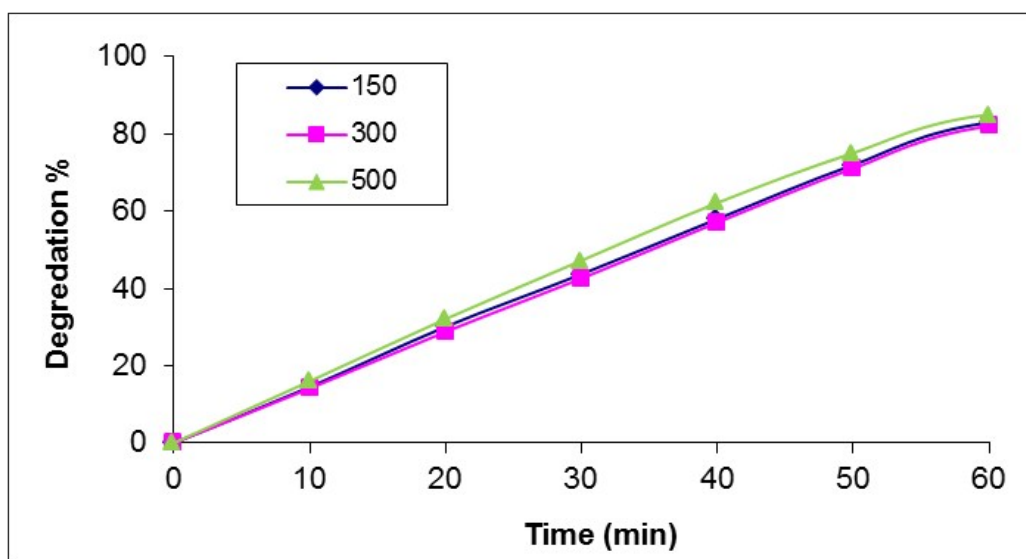

**Figure S4.** Photocatalytic degradation of 20 mg L<sup>-1</sup> phenol with 70 μL of H<sub>2</sub>O<sub>2</sub> under different powers of high pressure mercury: 150, 300, 500 W using 0.1 g RGOTi.
